# Supplementary material for: Surfactant-mediated formation of polymeric microlenses from interfacial microdroplets
Source: Royal Society of Chemistry journal article supplement (doi:10.1039/c3sm52568f), 2013-11-06

# Surfactant-mediated formation of polymeric microlenses from interfacial microdroplets

Haijun Yang<sup>1,2</sup>, Shuhua Peng<sup>1</sup>, Xiaotao Hao<sup>3</sup>, Trevor A. Smith<sup>3</sup>, Greg G. Qiao<sup>1</sup>,

Xuehua Zhang<sup>1,3\*</sup>

*1. Department of Chemical and Biomolecular Engineering, University of Melbourne,  
Parkville, VIC 3010, Australia*

*2. Shanghai Institute of Applied Physics, Chinese Academy of Sciences, Shanghai  
201800, China*

*3. School of Chemistry, University of Melbourne, Parkville, VIC 3010, Australia*

Email: [xuehuaz@unimelb.edu.au](mailto:xuehuaz@unimelb.edu.au)

ESI: (A) Side view of monomer droplets sitting on OTS-Si or bare silicon wafer in Solution B with different surfactant concentrations (0, 0.1, 0.5, 1, and 2 cmc), Scale bar:1 mm; and (B) their corresponding contact angles.

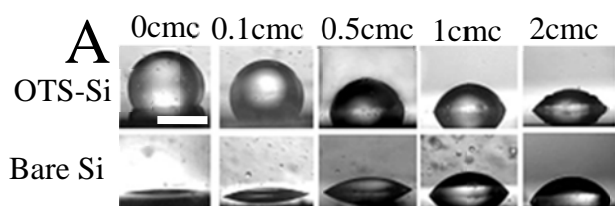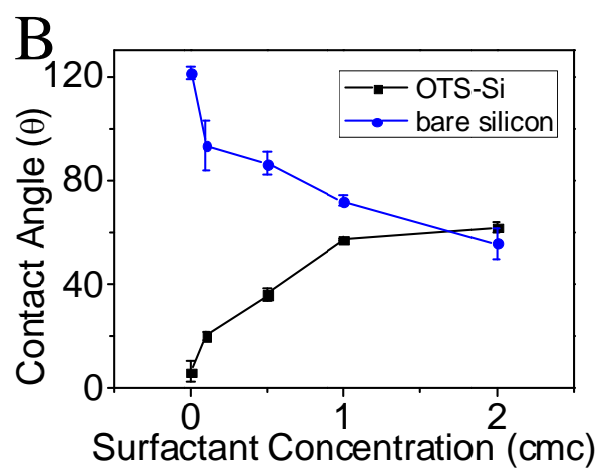

Supplement: c3sm52568f.pdf [file c3sm52568f.pdf]
